# Supplementary material for: Cross-Modal Sensory Boosting to Improve High-Frequency Hearing Loss: Device Development and Validation
Source: PubMed Central journal article supplement (PMC11008433; doi:10.2196/49969), 2024-02-09
Supplement: xmed-v5-e49969-s001.pdf [file xmed-v5-e49969-s001.pdf]

|                                     |             |
|-------------------------------------|-------------|
| Frequency range (Hz)                | 300 to 7500 |
| Reference test frequency (kHz)      | 1           |
| Harmonic distortion reference (SPL) | 105         |
| Harmonic distortion (%)             | .2          |
| Directionality                      | Omni        |
| Equivalent input noise (dBA SPL)    | 29          |
| Dynamic range (dB)                  | 91          |
| Acoustic overload point (dB SPL)    | 120         |
| Absolute max (dB SPL)               | 160         |
| Sensitivity levels <sup>3</sup>     | 3           |
| Feedback suppression                | Yes         |
| Ambient noise suppression           | Yes         |
| Frequency range adjustable          | Yes         |

*Table S1. Microphone characteristics*
