# Supplementary material for: Cross-Modal Sensory Boosting to Improve High-Frequency Hearing Loss: Device Development and Validation
Source: PubMed Central journal article supplement (PMC11008433; doi:10.2196/49969), 2024-02-09
Supplement: xmed-v5-e49969-s002.pdf [file xmed-v5-e49969-s002.pdf]

|                               | Baseline | Week 1 | Week 2 | Week 3 | Week 4 | Week 5 | Week 6 | 6 Week Change |
|-------------------------------|----------|--------|--------|--------|--------|--------|--------|---------------|
| Average                       | 40.32    | 31.71  | 29.60  | 31.37  | 29.58  | 27.96  | 27.93  | -11.95        |
| Standard Deviation            | 15.38    | 10.35  | 13.21  | 14.06  | 12.67  | 11.56  | 12.00  | 6.20          |
| Min                           | 20.06    | 13.89  | 9.83   | 8.56   | 7.28   | 5.39   | 5.44   | -24.28        |
| Max                           | 70.78    | 51.44  | 53.50  | 59.67  | 52.06  | 52.06  | 52.06  | -5.50         |
| Range                         | 50.72    | 37.56  | 43.67  | 51.11  | 44.78  | 46.67  | 46.61  | 18.78         |
| Standard deviation with HA    | 14.61    | 8.97   | 12.54  | 11.50  | 10.89  | 10.40  | 12.02  | 6.11          |
| Min with HA                   | 22.83    | 21.50  | 15.33  | 14.50  | 13.78  | 17.94  | 13.78  | -24.28        |
| Max with HA                   | 57.50    | 47.17  | 52.78  | 50.61  | 51.39  | 52.06  | 52.06  | -5.61         |
| Range with HA                 | 34.67    | 25.67  | 37.44  | 36.11  | 37.61  | 34.12  | 38.28  | 18.67         |
| Standard deviation without HA | 16.66    | 12.67  | 15.01  | 17.82  | 15.60  | 13.78  | 12.51  | 6.60          |
| Min without HA                | 20.06    | 13.89  | 9.83   | 8.56   | 7.28   | 5.39   | 5.44   | -22.94        |
| Max without HA                | 70.78    | 51.44  | 53.50  | 59.67  | 52.06  | 42.94  | 40.28  | -5.50         |
| Range                         | 50.72    | 37.56  | 43.67  | 51.11  | 44.78  | 37.56  | 34.83  | 17.44         |

*Table S2. APHAB summary statistics per week for all participants, the subgroup that did not wear hearing aids and the subgroup that did wear hearing aids. The benefit score is the baseline score minus the final score.*
