# Supplementary material for: Cross-Modal Sensory Boosting to Improve High-Frequency Hearing Loss: Device Development and Validation
Source: PubMed Central journal article supplement (PMC11008433; doi:10.2196/49969), 2024-02-09
Supplement: xmed-v5-e49969-s003.pdf [file xmed-v5-e49969-s003.pdf]

|                               | Baseline |       |       | Week 6 |       |       | Week 6 Benefit Score |        |        |
|-------------------------------|----------|-------|-------|--------|-------|-------|----------------------|--------|--------|
|                               | EOC      | BN    | RV    | EOC    | BN    | RV    | EOC                  | BN     | RV     |
| Average                       | 31.06    | 46.06 | 43.84 | 15.63  | 35.19 | 33.00 | 15.44                | 10.88  | 10.84  |
| Standard Deviation            | 17.04    | 17.25 | 18.31 | 7.16   | 18.02 | 14.92 | 13.88                | 17.54  | 16.95  |
| Min                           | 1.00     | 14.50 | 16.67 | 1.00   | 6.83  | 6.67  | 0.00                 | -35.50 | -16.67 |
| Max                           | 64.50    | 79.17 | 77.00 | 27.00  | 68.83 | 60.33 | 48.33                | 48.00  | 49.83  |
| Range                         | 34.71    | 49.38 | 48.17 | 16.88  | 28.95 | 31.07 | 17.83                | 20.43  | 17.10  |
| Average without HA            | 28.22    | 43.48 | 40.48 | 14.65  | 40.04 | 34.50 | 13.57                | 3.44   | 5.98   |
| Standard deviation without HA | 19.17    | 16.12 | 16.39 | 6.99   | 18.78 | 14.83 | 11.85                | 15.12  | 15.95  |
| Min without HA                | 20.67    | 18.67 | 16.67 | 2.83   | 6.83  | 6.67  | 4.33                 | 6.00   | -2.17  |
| Max without HA                | 64.50    | 79.17 | 77.00 | 25.00  | 52.17 | 50.00 | 41.67                | 48.00  | 49.83  |
| Range without HA              | 43.83    | 60.50 | 60.33 | 22.17  | 45.33 | 43.33 | 37.33                | 42.00  | 52.00  |
| Average with HA               | 14.45    | 19.35 | 21.01 | 7.73   | 16.15 | 15.98 | 13.88                | 17.54  | 16.95  |
| Standard deviation with HA    | 19.17    | 16.12 | 16.39 | 6.99   | 18.78 | 14.83 | 15.72                | 16.22  | 16.95  |
| Min with HA                   | 1.00     | 14.50 | 25.00 | 1.00   | 12.50 | 12.50 | 0.00                 | -35.50 | -16.67 |
| Max with HA                   | 62.50    | 70.67 | 68.50 | 27.00  | 68.83 | 60.33 | 48.33                | 24.83  | 43.50  |
| Range with HA                 | 61.50    | 56.17 | 43.50 | 26.00  | 56.33 | 47.83 | 48.33                | 60.33  | 60.17  |

*Table S3. APHAB subscale summary statistics per week for all participants, the subgroup that did not wear hearing aids and the subgroup that did wear hearing aids. EOC = Ease of Communication. BN = Background Noise. RV = Reverberation*
